# Supplementary material
Source: PubMed Central journal article supplement (PMC5984701)

## Supplementary Figures

**Fig S1.** PANGEA trial design (S2A) and treatment algorithm (S2B).

**Fig. S2.** Serial ctDNA *EGFR* copy number versus serum tumor marker while on therapy for patients 1-4

**Fig. S3.** “Genogram” figures by each treated patient indicating features of each case at baseline with low values at the center and high values towards the periphery. These factors serve as a framework to assisting in predicting favorable response to therapy, in addition to classical prognostic features including age, histopathology, tumor burden, comorbidities, etc. See also Figure 4G. Duration of therapy (Also see table S3): Pt 1, 43 weeks; Pt 2, 42 weeks; Pt 4, 14 weeks; Pt5, 17 weeks; Pt 6, 6 weeks (censored); Pt 7, 43 weeks.

**Figure S1.** PANGEA trial design (Figure S1A) and treatment algorithm (Figure S1B).

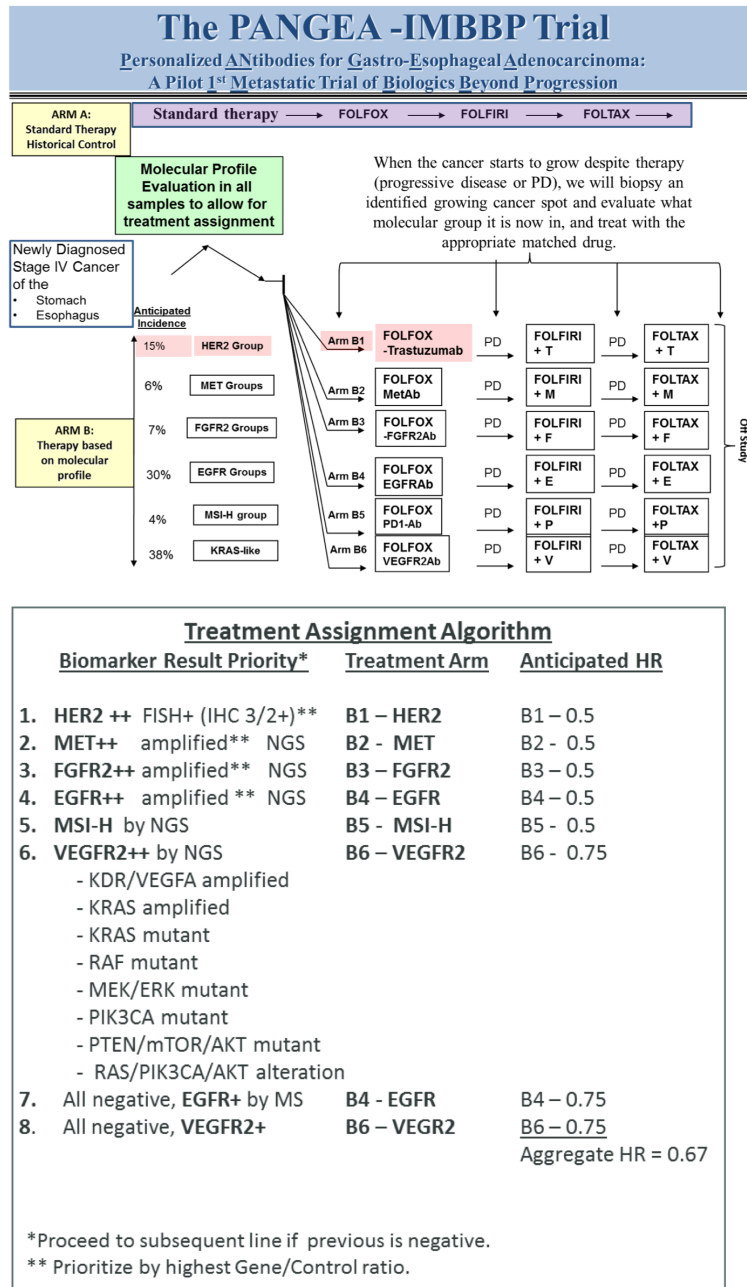

Catenacci et al. Towards personalized treatment for gastroesophageal adenocarcinoma: Strategies to address inter- and intra- patient tumor heterogeneity – PANGEA. J Clin Oncol 32, 2014 (suppl 3; abstr 66)

**Figure S2.** Serial ctDNA *EGFR* copy number versus serum tumor marker while on therapy for patients 1-4

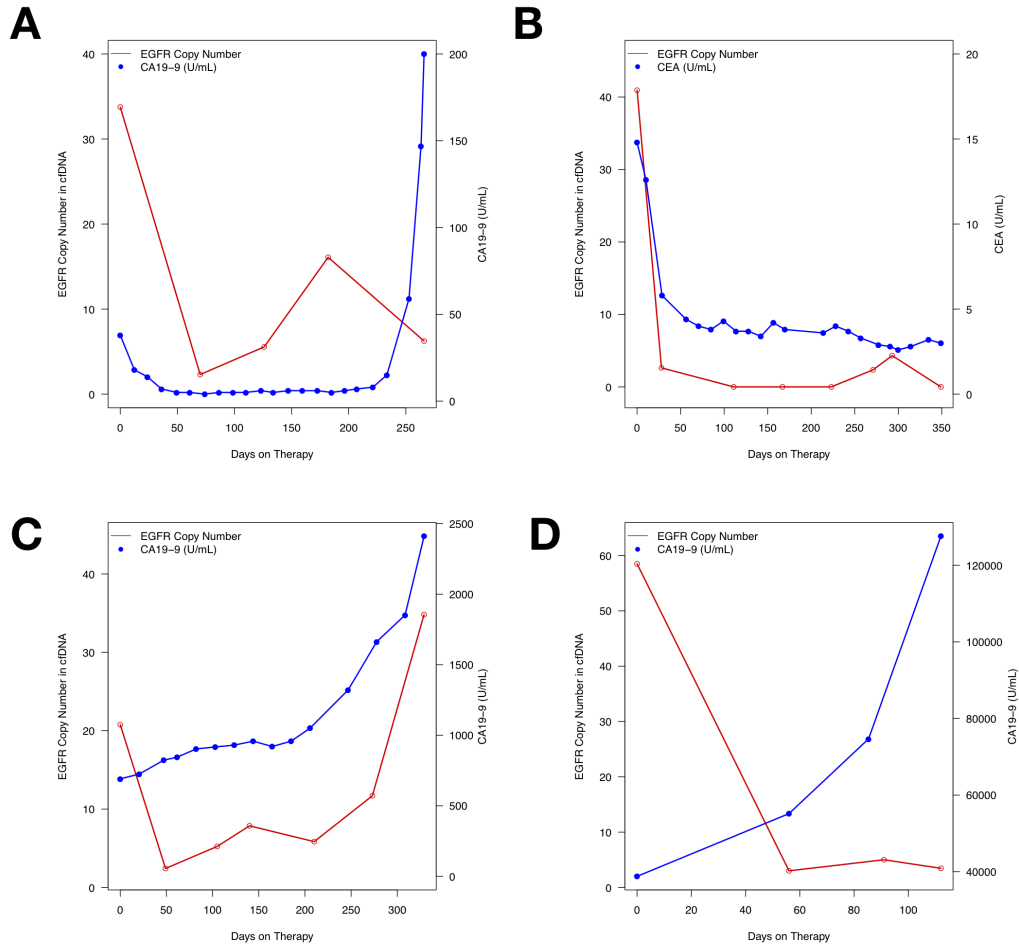

**Figure S3. “Genogram” by patient.**

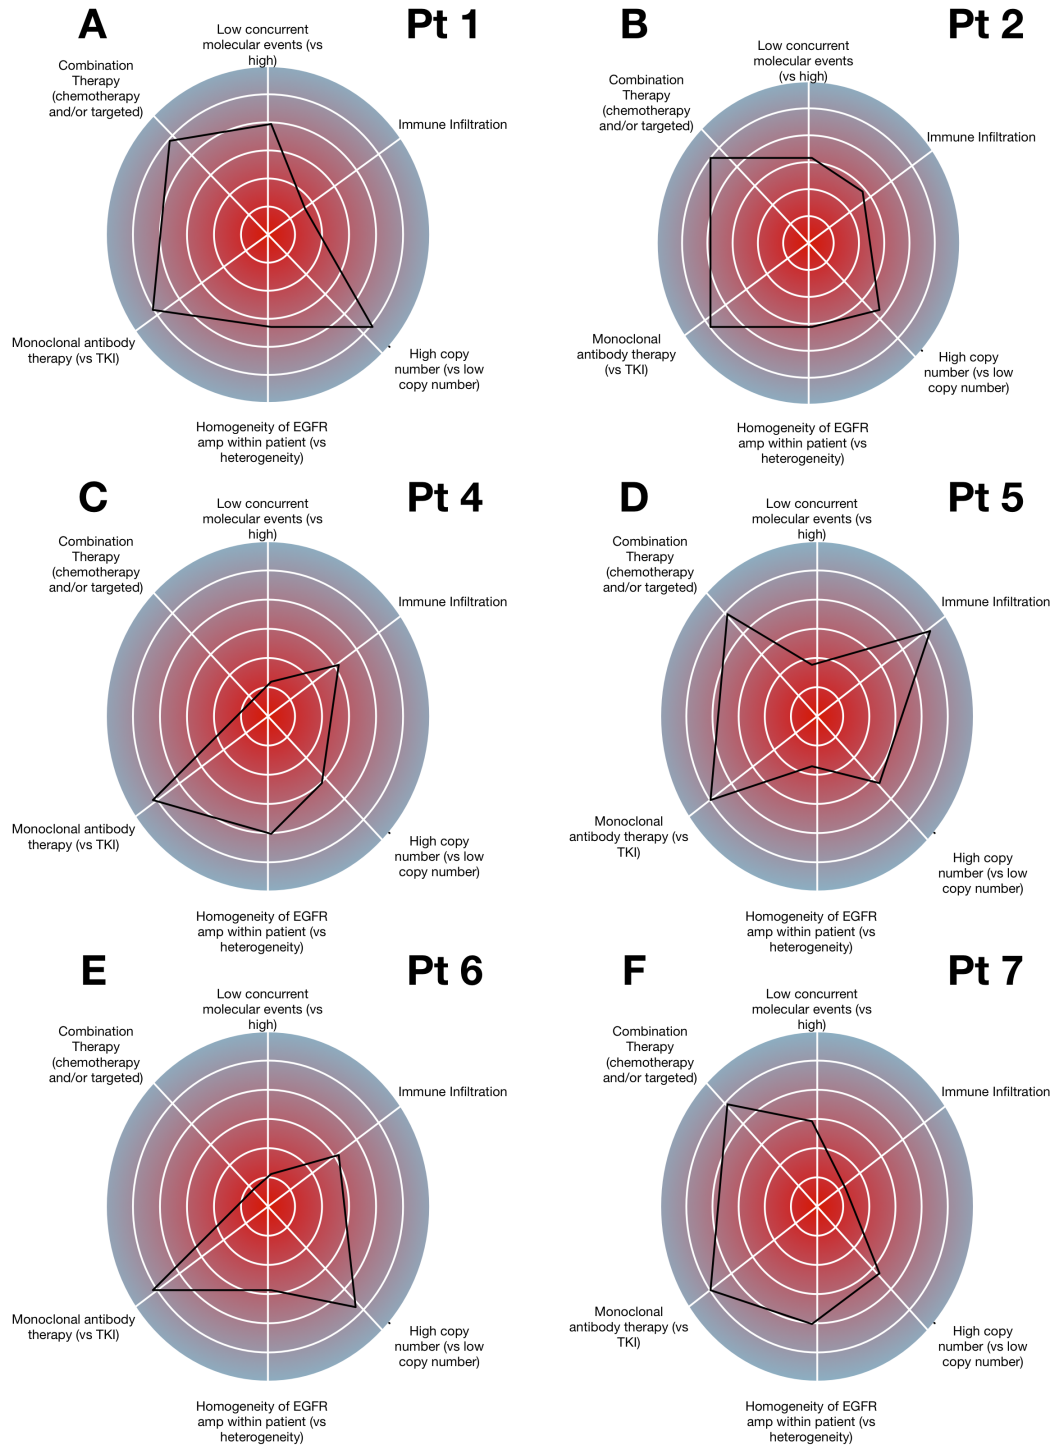

Supplement: NIHMS955275-supplement-1.pdf [file NIHMS955275-supplement-1.pdf]
